# Supplementary material for: Gene expression and alternative splicing dynamics are perturbed in female head transcriptomes following heterospecific copulation
Source: BMC Genomics. 2021 May 18;22:359. doi: 10.1186/s12864-021-07669-0 (PMC8132402; doi:10.1186/s12864-021-07669-0)
Supplement: Supplementary file 1 — Additional file 1: Table S1. Differentially expressed genes in head transcriptomes (FDR with alpha = 0.05) of females following con- and heterospecific matings between D. mojavensis and D. arizonae. Results are showing significant DE genes for each female species (Dmoj and Dari) and postmating period (45 min and 6 h). Significant (Con- or Heterospecific) and overlapping genes (Consp. and Hetero.) are indicated. Overlapping genes showing substantial differences between con- and heterospecific crosses are indicated (Consp. and Hetero. Diferent responses). Gene IDs and Gene symbols are based on D. mojavensis genome as extracted from D. melanogaster orthologous. Gene IDs based on D. mojavensis genome, while Gene symbols are extracted from D. melanogaster orthologous. (NA: not applicable). Table S2. Alternatively spliced genes in head transcriptomes (FDR with alpha = 0.01) of females following con- and heterospecific matings between D. mojavensis and D. arizonae. Results are showing significant AS genes for each female species (Dmoj and Dari) and postmating period (45 min and 6 h). Significant (Con- or Heterospecific) and overlapping genes (Consp. and Hetero.) are indicated. Gene IDs based on D. mojavensis genome, while Gene symbols are extracted from D. melanogaster orthologous. (NA: not applicable). [file 12864_2021_7669_MOESM1_ESM.xlsx]

## Sheet: Table 1S
Table 1S.	Differentially expressed genes in head transcriptomes (FDR with alpha = 0.05) of females following con- and heterospecific matings between D. mojavensis and D. arizonae. Results are showing significant DE genes for each female species (Dmoj and Dari) and postmating period (45min and 6h). Significant (Con- or Heterospecific) and overlapping genes (Consp. and Hetero.) are indicated. Overlapping gen…
Gene ID	Gene symbol	Dmoj.fem.45min	Dari.fem.45min	Dmoj.fem.6h	Dari.fem.6h
FBgn0012567	Dmoj\Adh2	No-AS	No-AS	Conspecific	No-AS
FBgn0132887	Dmoj\GI10121	No-AS	Conspecific	No-AS	No-AS
FBgn0132893	NA	No-AS	Conspecific	Conspecific	No-AS
FBgn0132897	NA	Conspecific	Heterospecific	Consp. and Hetero.	No-AS
FBgn0132903	Dmoj\GI10137	Conspecific	No-AS	No-AS	No-AS
FBgn0132908	Dmoj\GI10142	No-AS	Consp. and Hetero.	No-AS	No-AS
FBgn0132977	Dmoj\GI10211	No-AS	No-AS	Heterospecific	No-AS
FBgn0133013	Dmoj\GI10248	Conspecific	No-AS	No-AS	No-AS
FBgn0133093	Dmoj\GI10328	Conspecific	Conspecific	Conspecific	NA
FBgn0133111	Dmoj\GI10347	No-AS	No-AS	Heterospecific	No-AS
FBgn0133190	Dmoj\GI10426	No-AS	No-AS	Conspecific	No-AS
FBgn0133212	Dmoj\GI10448	No-AS	No-AS	Conspecific	No-AS
FBgn0133238	NA	No-AS	Conspecific	No-AS	No-AS
FBgn0133240	Dmoj\GI10476	No-AS	Consp. and Hetero.	No-AS	No-AS
FBgn0133248	Dmoj\Desat2	No-AS	No-AS	Heterospecific	No-AS
FBgn0133249	Dmoj\Desat1	No-AS	Conspecific	Conspecific	No-AS
FBgn0133341	Dmoj\GI10577	Conspecific	No-AS	No-AS	No-AS
FBgn0133384	Dmoj\GI10620	Conspecific	No-AS	Conspecific	No-AS
FBgn0133444	NA	No-AS	No-AS	Conspecific	No-AS
FBgn0133457	Dmoj\GI10693	No-AS	No-AS	Conspecific	No-AS
FBgn0133615	NA	Conspecific	No-AS	No-AS	No-AS
FBgn0133677	NA	Conspecific	No-AS	No-AS	No-AS
FBgn0133841	NA	No-AS	Conspecific	No-AS	No-AS
FBgn0133860	NA	No-AS	Conspecific	Heterospecific	No-AS
FBgn0134065	NA	No-AS	No-AS	Conspecific	No-AS
FBgn0134136	Dmoj\GI11375	No-AS	No-AS	Conspecific	No-AS
FBgn0134276	NA	No-AS	No-AS	Consp. and Hetero.	No-AS
FBgn0134349	Dmoj\GI11589	Conspecific	No-AS	No-AS	No-AS
FBgn0134457	Dmoj\GI11698	No-AS	Heterospecific	No-AS	No-AS
FBgn0134575	Dmoj\GI11816	No-AS	No-AS	Conspecific	No-AS
FBgn0134611	Dmoj\GI11853	No-AS	No-AS	Conspecific	No-AS
FBgn0134637	Dmoj\GI11879	Conspecific	Conspecific	Conspecific	No-AS
FBgn0134734	NA	Conspecific	Heterospecific	No-AS	No-AS
FBgn0134739	Dmoj\GI11982	No-AS	Heterospecific	No-AS	No-AS
FBgn0134771	Dmoj\GI12014	No-AS	No-AS	Conspecific	No-AS
FBgn0134834	Dmoj\GI12077	Conspecific	Heterospecific	Conspecific	No-AS
FBgn0134920	NA	Conspecific	No-AS	Consp. and Hetero.	No-AS
FBgn0134950	Dmoj\GI12193	Consp. and Hetero.	Consp. and Hetero.	Conspecific	No-AS
FBgn0134966	Dmoj\GI12209	Consp. and Hetero.	Conspecific	No-AS	No-AS
FBgn0135021	Dmoj\GI12264	Conspecific	No-AS	Conspecific	No-AS
FBgn0135041	Dmoj\GI12284	No-AS	No-AS	Conspecific	No-AS
FBgn0135126	Dmoj\GI12369	Conspecific	Consp. and Hetero.	Consp. and Hetero.	No-AS
FBgn0135171	Dmoj\GI12414	Conspecific	Consp. and Hetero.	No-AS	No-AS
FBgn0135206	Dmoj\GI12449	No-AS	No-AS	Consp. and Hetero.	No-AS
FBgn0135290	Dmoj\GI12533	No-AS	Heterospecific	No-AS	No-AS
FBgn0135472	Dmoj\GI12715	No-AS	Conspecific	Conspecific	No-AS
FBgn0135483	Dmoj\GI12726	No-AS	No-AS	Conspecific	No-AS
FBgn0135540	NA	Consp. and Hetero.	No-AS	No-AS	No-AS
FBgn0135666	Dmoj\GI12909	No-AS	No-AS	Consp. and Hetero.	No-AS
FBgn0135686	Dmoj\GI12929	No-AS	No-AS	Consp. and Hetero.	No-AS
FBgn0136002	Dmoj\GI13245	No-AS	No-AS	Heterospecific	No-AS
FBgn0136026	Dmoj\GI13269	No-AS	No-AS	Heterospecific	No-AS
FBgn0136036	Dmoj\GI13279	Conspecific	No-AS	No-AS	No-AS
FBgn0136140	Dmoj\GI13383	No-AS	Conspecific	No-AS	No-AS
FBgn0136160	Dmoj\GI13403	Consp. and Hetero.	Conspecific	No-AS	No-AS
FBgn0136403	Dmoj\GI13648	Conspecific	No-AS	No-AS	No-AS
FBgn0136445	NA	No-AS	No-AS	Conspecific	NA
FBgn0136568	Dmoj\GI13814	No-AS	Heterospecific	No-AS	No-AS
FBgn0136659	Dmoj\GI13905	Conspecific	No-AS	Consp. and Hetero.	No-AS
FBgn0136680	Dmoj\GI13926	No-AS	No-AS	Conspecific	No-AS
FBgn0136704	Dmoj\GI13950	No-AS	Conspecific	Conspecific	No-AS
FBgn0136724	Dmoj\GI13970	No-AS	No-AS	Conspecific	No-AS
FBgn0136810	NA	Conspecific	No-AS	No-AS	No-AS
FBgn0136812	Dmoj\GI14058	No-AS	No-AS	Heterospecific	No-AS
FBgn0136836	Dmoj\GI14082	Conspecific	No-AS	Consp. and Hetero.	No-AS
FBgn0136852	Dmoj\GI14098	Conspecific	No-AS	No-AS	No-AS
FBgn0136860	Dmoj\GI14106	Conspecific	Heterospecific	Conspecific	No-AS
FBgn0136934	Dmoj\GI14181	No-AS	Conspecific	No-AS	No-AS
FBgn0137104	Dmoj\GI14351	No-AS	Conspecific	No-AS	No-AS
FBgn0137155	Dmoj\GI14403	No-AS	No-AS	Consp. and Hetero.	No-AS
FBgn0137165	Dmoj\GI14413	No-AS	Consp. and Hetero.	No-AS	No-AS
FBgn0137170	NA	No-AS	No-AS	Conspecific	No-AS
FBgn0137199	Dmoj\GI14447	No-AS	Consp. and Hetero.	No-AS	No-AS
FBgn0137348	Dmoj\GI14597	No-AS	Heterospecific	No-AS	No-AS
FBgn0137381	Dmoj\GI14630	Conspecific	No-AS	No-AS	No-AS
FBgn0137434	Dmoj\GI14683	Conspecific	No-AS	No-AS	No-AS
FBgn0137462	NA	No-AS	No-AS	Conspecific	No-AS
FBgn0137468	Dmoj\GI14717	No-AS	Conspecific	No-AS	No-AS
FBgn0137553	NA	No-AS	NA	Heterospecific	No-AS
FBgn0137579	Dmoj\GI14828	Heterospecific	No-AS	No-AS	No-AS
FBgn0137696	NA	Conspecific	Consp. and Hetero.	Conspecific	No-AS
FBgn0137697	Dmoj\GI14946	No-AS	Conspecific	No-AS	No-AS
FBgn0137786	NA	No-AS	No-AS	Heterospecific	No-AS
FBgn0137788	Dmoj\GI15038	Conspecific	No-AS	Heterospecific	No-AS
FBgn0137789	Dmoj\GI15039	Consp. and Hetero.	Conspecific	No-AS	No-AS
FBgn0137875	NA	No-AS	No-AS	Consp. and Hetero.	No-AS
FBgn0137912	NA	No-AS	No-AS	Conspecific	No-AS
FBgn0137951	NA	Consp. and Hetero.	Heterospecific	Conspecific	No-AS
FBgn0138037	Dmoj\GI15288	Conspecific	No-AS	No-AS	No-AS
FBgn0138061	NA	No-AS	Heterospecific	No-AS	No-AS
FBgn0138086	NA	No-AS	No-AS	Conspecific	No-AS
FBgn0138117	Dmoj\GI15368	No-AS	No-AS	Conspecific	No-AS
FBgn0138183	Dmoj\GI15434	Conspecific	No-AS	No-AS	No-AS
FBgn0138279	Dmoj\GI15530	Consp. and Hetero.	No-AS	Heterospecific	No-AS
FBgn0138316	Dmoj\GI15567	Consp. and Hetero.	Consp. and Hetero.	No-AS	No-AS
FBgn0138347	Dmoj\GI15598	Conspecific	No-AS	No-AS	No-AS
FBgn0138355	Dmoj\GI15606	Conspecific	No-AS	Conspecific	No-AS
FBgn0138465	Dmoj\GI15716	No-AS	Conspecific	No-AS	No-AS
FBgn0138516	NA	No-AS	Conspecific	No-AS	No-AS
FBgn0138529	NA	No-AS	Conspecific	Heterospecific	No-AS
FBgn0138573	NA	Conspecific	No-AS	No-AS	No-AS
FBgn0138631	Dmoj\GI15882	No-AS	No-AS	Conspecific	NA
FBgn0138683	NA	Consp. and Hetero.	No-AS	Consp. and Hetero.	No-AS
FBgn0138722	Dmoj\GI15973	No-AS	No-AS	Conspecific	No-AS
FBgn0138823	Dmoj\GI16074	No-AS	No-AS	Conspecific	No-AS
FBgn0138939	NA	Conspecific	No-AS	Conspecific	No-AS
FBgn0138972	Dmoj\GI16223	No-AS	No-AS	Conspecific	No-AS
FBgn0138981	Dmoj\GI16232	No-AS	No-AS	Conspecific	No-AS
FBgn0139031	NA	No-AS	Conspecific	No-AS	No-AS
FBgn0139053	Dmoj\GI16305	No-AS	Conspecific	No-AS	No-AS
FBgn0139057	Dmoj\Obp19d	No-AS	Heterospecific	Heterospecific	No-AS
FBgn0139173	NA	No-AS	No-AS	Conspecific	No-AS
FBgn0139266	Dmoj\GI16518	Consp. and Hetero.	No-AS	No-AS	No-AS
FBgn0139546	Dmoj\GI16799	Conspecific	No-AS	No-AS	No-AS
FBgn0139547	NA	No-AS	No-AS	Conspecific	No-AS
FBgn0139623	Dmoj\GI16877	No-AS	Conspecific	No-AS	No-AS
FBgn0139800	Dmoj\GI17055	No-AS	Conspecific	Consp. and Hetero.	No-AS
FBgn0139862	Dmoj\GI17118	No-AS	No-AS	Conspecific	No-AS
FBgn0139949	Dmoj\GI17205	No-AS	No-AS	Conspecific	No-AS
FBgn0139950	Dmoj\GI17206	No-AS	No-AS	Consp. and Hetero.	No-AS
FBgn0139964	Dmoj\GI17220	Consp. and Hetero.	No-AS	No-AS	No-AS
FBgn0139965	Dmoj\GI17221	No-AS	Conspecific	Heterospecific	No-AS
FBgn0139967	Dmoj\GI17223	No-AS	No-AS	Consp. and Hetero.	No-AS
FBgn0140034	Dmoj\GI17290	Conspecific	No-AS	Consp. and Hetero.	NA
FBgn0140219	Dmoj\GI17475	Conspecific	No-AS	No-AS	No-AS
FBgn0140276	Dmoj\GI17532	No-AS	No-AS	Conspecific	No-AS
FBgn0140393	NA	No-AS	No-AS	Conspecific	No-AS
FBgn0140395	Dmoj\GI17654	Conspecific	No-AS	Consp. and Hetero.	No-AS
FBgn0140435	Dmoj\GI17694	Consp. and Hetero.	No-AS	Heterospecific	No-AS
FBgn0140627	NA	No-AS	No-AS	Consp. and Hetero.	No-AS
FBgn0140653	Dmoj\GI17912	No-AS	NA	Consp. and Hetero.	No-AS
FBgn0140677	Dmoj\GI17937	Conspecific	No-AS	Conspecific	No-AS
FBgn0140699	NA	Conspecific	Conspecific	Conspecific	No-AS
FBgn0140947	Dmoj\GI18208	No-AS	No-AS	Heterospecific	No-AS
FBgn0141000	NA	No-AS	Conspecific	No-AS	No-AS
FBgn0141085	Dmoj\GI18346	Consp. and Hetero.	NA	Consp. and Hetero.	NA
FBgn0141216	Dmoj\GI18477	Conspecific	Heterospecific	No-AS	No-AS
FBgn0141232	Dmoj\GI18493	Conspecific	No-AS	No-AS	No-AS
FBgn0141311	Dmoj\GI18572	Consp. and Hetero.	No-AS	Consp. and Hetero.	No-AS
FBgn0141359	Dmoj\GI18620	No-AS	No-AS	Consp. and Hetero.	No-AS
FBgn0141537	Dmoj\GI18798	No-AS	Conspecific	No-AS	No-AS
FBgn0141657	Dmoj\GI18918	No-AS	Heterospecific	No-AS	No-AS
FBgn0141688	NA	Conspecific	Conspecific	No-AS	No-AS
FBgn0141743	NA	No-AS	Heterospecific	Conspecific	No-AS
FBgn0141817	Dmoj\GI19078	Conspecific	No-AS	Conspecific	No-AS
FBgn0141825	Dmoj\GI19086	No-AS	No-AS	Conspecific	No-AS
FBgn0141833	Dmoj\GI19094	No-AS	No-AS	Conspecific	No-AS
FBgn0141834	Dmoj\GI19095	No-AS	No-AS	Conspecific	No-AS
FBgn0141843	Dmoj\GI19104	No-AS	No-AS	Conspecific	No-AS
FBgn0141859	Dmoj\GI19120	No-AS	Conspecific	No-AS	No-AS
FBgn0141915	Dmoj\GI19176	Conspecific	No-AS	Conspecific	No-AS
FBgn0141920	NA	No-AS	No-AS	Conspecific	No-AS
FBgn0141945	Dmoj\GI19206	No-AS	Conspecific	No-AS	No-AS
FBgn0141946	Dmoj\GI19207	No-AS	Conspecific	No-AS	No-AS
FBgn0141967	NA	No-AS	Conspecific	No-AS	No-AS
FBgn0142051	Dmoj\GI19313	Consp. and Hetero.	No-AS	Consp. and Hetero.	No-AS
FBgn0142064	Dmoj\GI19326	No-AS	No-AS	Heterospecific	No-AS
FBgn0142083	NA	No-AS	No-AS	Conspecific	No-AS
FBgn0142124	Dmoj\GI19386	No-AS	Heterospecific	No-AS	No-AS
FBgn0142195	Dmoj\GI19457	No-AS	Conspecific	No-AS	No-AS
FBgn0142320	Dmoj\GI19583	Conspecific	No-AS	No-AS	No-AS
FBgn0142366	NA	No-AS	No-AS	Conspecific	No-AS
FBgn0142475	Dmoj\GI19738	No-AS	No-AS	Consp. and Hetero.	No-AS
FBgn0142501	Dmoj\GI19764	No-AS	No-AS	Heterospecific	No-AS
FBgn0142535	Dmoj\GI19798	No-AS	Heterospecific	No-AS	No-AS
FBgn0142638	Dmoj\GI19901	No-AS	No-AS	Heterospecific	No-AS
FBgn0142645	NA	No-AS	Conspecific	No-AS	No-AS
FBgn0142683	Dmoj\GI19946	Heterospecific	NA	Heterospecific	No-AS
FBgn0142778	Dmoj\GI20042	Conspecific	NA	No-AS	No-AS
FBgn0142895	Dmoj\GI20159	No-AS	Heterospecific	No-AS	No-AS
FBgn0142911	Dmoj\GI20175	No-AS	Heterospecific	No-AS	No-AS
FBgn0142998	Dmoj\GI20262	No-AS	No-AS	Heterospecific	No-AS
FBgn0143116	Dmoj\GI20380	Conspecific	Consp. and Hetero.	No-AS	No-AS
FBgn0143153	Dmoj\GI20417	Consp. and Hetero.	No-AS	No-AS	No-AS
FBgn0143203	Dmoj\GI20467	Conspecific	No-AS	Consp. and Hetero.	No-AS
FBgn0143240	Dmoj\GI20504	No-AS	Heterospecific	No-AS	No-AS
FBgn0143273	NA	No-AS	Conspecific	Consp. and Hetero.	Heterospecific
FBgn0143281	NA	No-AS	No-AS	Conspecific	No-AS
FBgn0143304	NA	No-AS	Conspecific	No-AS	No-AS
FBgn0143325	Dmoj\GI20590	No-AS	No-AS	Conspecific	No-AS
FBgn0143329	NA	Conspecific	Consp. and Hetero.	No-AS	No-AS
FBgn0143392	Dmoj\GI20657	No-AS	Heterospecific	No-AS	No-AS
FBgn0143449	Dmoj\GI20714	Consp. and Hetero.	No-AS	Consp. and Hetero.	No-AS
FBgn0143452	Dmoj\GI20717	Conspecific	No-AS	No-AS	No-AS
FBgn0143490	Dmoj\GI20755	No-AS	Heterospecific	No-AS	No-AS
FBgn0143504	Dmoj\GI20769	No-AS	Conspecific	No-AS	No-AS
FBgn0143551	Dmoj\GI20816	No-AS	Conspecific	No-AS	No-AS
FBgn0143626	Dmoj\GI20892	Conspecific	No-AS	No-AS	No-AS
FBgn0143688	Dmoj\GI20954	No-AS	No-AS	Conspecific	No-AS
FBgn0143772	Dmoj\GI21040	No-AS	No-AS	Conspecific	No-AS
FBgn0143893	Dmoj\GI21162	Conspecific	Conspecific	Conspecific	No-AS
FBgn0143924	Dmoj\GI21194	Consp. and Hetero.	No-AS	No-AS	No-AS
FBgn0143955	Dmoj\GI21225	No-AS	No-AS	Conspecific	No-AS
FBgn0144093	NA	No-AS	No-AS	Consp. and Hetero.	No-AS
FBgn0144218	Dmoj\GI21488	No-AS	No-AS	Consp. and Hetero.	No-AS
FBgn0144223	NA	No-AS	Consp. and Hetero.	No-AS	No-AS
FBgn0144250	Dmoj\GI21520	No-AS	No-AS	No-AS	Conspecific
FBgn0144263	NA	Conspecific	Heterospecific	No-AS	No-AS
FBgn0144284	NA	Conspecific	No-AS	No-AS	No-AS
FBgn0144302	Dmoj\GI21572	No-AS	No-AS	Conspecific	No-AS
FBgn0144356	Dmoj\GI21626	Consp. and Hetero.	No-AS	Consp. and Hetero.	No-AS
FBgn0144447	Dmoj\GI21717	No-AS	Consp. and Hetero.	No-AS	No-AS
FBgn0144482	Dmoj\GI21752	Consp. and Hetero.	Conspecific	No-AS	No-AS
FBgn0144544	Dmoj\GI21814	Conspecific	Heterospecific	No-AS	No-AS
FBgn0144725	Dmoj\GI21996	Conspecific	Conspecific	No-AS	No-AS
FBgn0144794	Dmoj\GI22065	No-AS	Conspecific	No-AS	No-AS
FBgn0144805	Dmoj\GI22076	Conspecific	No-AS	No-AS	No-AS
FBgn0144811	NA	No-AS	No-AS	Consp. and Hetero.	Heterospecific
FBgn0145004	Dmoj\GI22276	No-AS	Consp. and Hetero.	No-AS	No-AS
FBgn0145090	Dmoj\GI22362	No-AS	Consp. and Hetero.	Conspecific	No-AS
FBgn0145099	NA	No-AS	No-AS	Heterospecific	No-AS
FBgn0145102	Dmoj\GI22374	No-AS	No-AS	Conspecific	No-AS
FBgn0145203	Dmoj\GI22475	Conspecific	No-AS	No-AS	No-AS
FBgn0145214	NA	No-AS	Conspecific	No-AS	No-AS
FBgn0145248	NA	No-AS	No-AS	Heterospecific	No-AS
FBgn0145369	NA	Consp. and Hetero.	Consp. and Hetero.	Consp. and Hetero.	No-AS
FBgn0145574	NA	No-AS	No-AS	Heterospecific	NA
FBgn0145580	Dmoj\GI22853	No-AS	Conspecific	No-AS	No-AS
FBgn0145601	Dmoj\GI22874	No-AS	Heterospecific	No-AS	No-AS
FBgn0145650	Dmoj\GI22923	No-AS	No-AS	Conspecific	No-AS
FBgn0145654	Dmoj\GI22927	Conspecific	No-AS	No-AS	No-AS
FBgn0145656	Dmoj\GI22929	Conspecific	Heterospecific	No-AS	No-AS
FBgn0145668	NA	Conspecific	No-AS	No-AS	No-AS
FBgn0145680	NA	Conspecific	No-AS	Conspecific	No-AS
FBgn0145848	Dmoj\GI23121	No-AS	No-AS	Conspecific	No-AS
FBgn0145946	Dmoj\GI23219	No-AS	Heterospecific	No-AS	No-AS
FBgn0145975	Dmoj\GI23248	No-AS	Consp. and Hetero.	No-AS	No-AS
FBgn0145993	Dmoj\GI23266	No-AS	No-AS	Conspecific	No-AS
FBgn0146208	Dmoj\GI23482	No-AS	No-AS	Conspecific	No-AS
FBgn0146251	NA	No-AS	Heterospecific	No-AS	No-AS
FBgn0146297	NA	No-AS	No-AS	Conspecific	No-AS
FBgn0146338	NA	Conspecific	No-AS	No-AS	No-AS
FBgn0146389	Dmoj\GI23663	Consp. and Hetero.	Heterospecific	Consp. and Hetero.	No-AS
FBgn0146423	Dmoj\GI23697	No-AS	Consp. and Hetero.	No-AS	No-AS
FBgn0146424	Dmoj\GI23698	No-AS	No-AS	Heterospecific	No-AS
FBgn0146496	Dmoj\GI23771	Consp. and Hetero.	No-AS	No-AS	No-AS
FBgn0146498	Dmoj\GI23773	Conspecific	No-AS	Conspecific	No-AS
FBgn0146515	NA	No-AS	Conspecific	No-AS	NA
FBgn0146557	Dmoj\GI23832	Heterospecific	No-AS	No-AS	No-AS
FBgn0146588	Dmoj\GI23863	No-AS	No-AS	Consp. and Hetero.	No-AS
FBgn0146608	Dmoj\GI23883	No-AS	No-AS	Consp. and Hetero.	No-AS
FBgn0146645	NA	Conspecific	No-AS	Conspecific	No-AS
FBgn0146660	NA	No-AS	Conspecific	No-AS	No-AS
FBgn0146688	Dmoj\GI23964	No-AS	Conspecific	No-AS	No-AS
FBgn0146734	NA	Conspecific	No-AS	No-AS	No-AS
FBgn0146742	Dmoj\slo	No-AS	No-AS	Heterospecific	No-AS
FBgn0146763	Dmoj\GI24040	No-AS	Heterospecific	No-AS	No-AS
FBgn0146790	Dmoj\GI24067	No-AS	Heterospecific	No-AS	Heterospecific
FBgn0146805	Dmoj\GI24082	Conspecific	No-AS	Conspecific	No-AS
FBgn0146829	Dmoj\GI24106	No-AS	No-AS	Conspecific	No-AS
FBgn0146863	NA	No-AS	No-AS	Consp. and Hetero.	No-AS
FBgn0146925	NA	No-AS	No-AS	Conspecific	No-AS
FBgn0147089	Dmoj\GI24366	No-AS	Conspecific	No-AS	NA
FBgn0147301	Dmoj\GI24579	No-AS	No-AS	Heterospecific	No-AS
FBgn0147367	Dmoj\GI24645	No-AS	No-AS	Conspecific	No-AS
FBgn0147378	Dmoj\GI24656	No-AS	No-AS	Conspecific	No-AS
FBgn0147481	Dmoj\GI24759	No-AS	No-AS	Conspecific	No-AS
FBgn0147568	NA	Conspecific	No-AS	No-AS	No-AS
FBgn0147585	Dmoj\GI24865	No-AS	No-AS	Consp. and Hetero.	No-AS
FBgn0280220	NA	Heterospecific	No-AS	No-AS	NA
FBgn0280520	NA	No-AS	NA	NA	Conspecific
FBgn0280726	Dmoj\GI25989	No-AS	No-AS	Heterospecific	No-AS
FBgn0280804	NA	Conspecific	Conspecific	No-AS	No-AS
FBgn0280899	Dmoj\GI26162	NA	NA	NA	Conspecific
FBgn0280911	Dmoj\GI26174	No-AS	Conspecific	No-AS	No-AS
FBgn0280987	NA	Conspecific	Consp. and Hetero.	Consp. and Hetero.	No-AS
FBgn0281090	NA	Consp. and Hetero.	NA	Conspecific	No-AS
FBgn0281156	NA	Consp. and Hetero.	No-AS	No-AS	No-AS
FBgn0281494	Dmoj\GI26757	No-AS	No-AS	No-AS	Heterospecific
FBgn0281499	Dmoj\GI26762	NA	NA	NA	Conspecific
FBgn0281579	NA	No-AS	NA	No-AS	Consp. and Hetero.
FBgn0281601	NA	No-AS	Heterospecific	Heterospecific	No-AS
FBgn0141754	Dmoj\GI19015	Heterospecifc	No-DE	Conspecifc	No-DE
FBgn0141756	Dmoj\GI19017	Conspecifc	No-DE	Conspecifc	No-DE
FBgn0141762	Dmoj\GI19023	No-DE	Heterospecifc	No-DE	No-DE
FBgn0141772	Dmoj\GI19033	No-DE	No-DE	No-DE	Heterospecifc
FBgn0141804	Dmoj\GI19065	Conspecifc	No-DE	No-DE	No-DE
FBgn0141897	Dmoj\GI19158	No-DE	No-DE	Conspecifc	No-DE
FBgn0141918	Dmoj\GI19179	Heterospecifc	No-DE	Conspecifc	No-DE
FBgn0141919	Dmoj\GI19180	No-DE	Consp. and Hetero.	No-DE	Consp. and Hetero.
FBgn0141948	Dmoj\GI19209	No-DE	No-DE	No-DE	Heterospecifc
FBgn0141962	Dmoj\GI19223	Consp. and Hetero.	Heterospecifc	Consp. and Hetero.	Heterospecifc
FBgn0142039	Dmoj\GI19300	Conspecifc	No-DE	No-DE	No-DE
FBgn0142051	Dmoj\GI19313	Consp. and Hetero.	No-DE	Consp. and Hetero.	No-DE
FBgn0142113	NA	No-DE	Heterospecifc	No-DE	No-DE
FBgn0142155	Dmoj\GI19417	Conspecifc	No-DE	No-DE	No-DE
FBgn0142156	Dmoj\GI19418	No-DE	No-DE	Conspecifc	No-DE
FBgn0142179	Dmoj\GI19441	Conspecifc	Heterospecifc	Conspecifc	Heterospecifc
FBgn0142364	Dmoj\GI19627	Heterospecifc	Consp. and Hetero. (Different responses)	Heterospecifc	No-DE
FBgn0142368	NA	No-DE	Heterospecifc	No-DE	Consp. and Hetero.
FBgn0142385	Dmoj\GI19648	Heterospecifc	No-DE	Heterospecifc	No-DE
FBgn0142391	NA	Heterospecifc	No-DE	Heterospecifc	No-DE
FBgn0142404	NA	No-DE	Heterospecifc	No-DE	No-DE
FBgn0142448	NA	No-DE	No-DE	Heterospecifc	No-DE
FBgn0142494	Dmoj\GI19757	No-DE	No-DE	No-DE	Heterospecifc
FBgn0142550	Dmoj\GI19813	Conspecifc	No-DE	Conspecifc	No-DE
FBgn0142556	Dmoj\GI19819	No-DE	No-DE	No-DE	Conspecifc
FBgn0142585	NA	No-DE	No-DE	Consp. and Hetero.	No-DE
FBgn0142678	Dmoj\GI19941	Heterospecifc	No-DE	No-DE	No-DE
FBgn0142683	Dmoj\GI19946	Heterospecifc	No-DE	No-DE	No-DE
FBgn0142712	Dmoj\GI19975	Conspecifc	No-DE	No-DE	No-DE
FBgn0142737	Dmoj\GI20000	Conspecifc	Heterospecifc	No-DE	No-DE
FBgn0142788	Dmoj\GI20052	Conspecifc	No-DE	No-DE	No-DE
FBgn0142809	Dmoj\GI20073	No-DE	No-DE	Heterospecifc	No-DE
FBgn0142811	Dmoj\GI20075	Conspecifc	No-DE	No-DE	No-DE
FBgn0142819	NA	Heterospecifc	No-DE	No-DE	No-DE
FBgn0142870	Dmoj\GI20134	Heterospecifc	No-DE	No-DE	No-DE
FBgn0142908	Dmoj\GI20172	Conspecifc	No-DE	No-DE	No-DE
FBgn0142945	Dmoj\GI20209	Heterospecifc	No-DE	No-DE	No-DE
FBgn0142975	Dmoj\GI20239	Heterospecifc	No-DE	Heterospecifc	No-DE
FBgn0143021	NA	Consp. and Hetero.	Consp. and Hetero.	No-DE	Heterospecifc
FBgn0143034	Dmoj\GI20298	No-DE	No-DE	Conspecifc	No-DE
FBgn0143156	Dmoj\GI20420	No-DE	No-DE	Consp. and Hetero.	Heterospecifc
FBgn0143164	Dmoj\GI20428	Conspecifc	No-DE	No-DE	No-DE
FBgn0143287	NA	No-DE	No-DE	No-DE	Heterospecifc
FBgn0143311	Dmoj\GI20575	No-DE	No-DE	No-DE	Heterospecifc
FBgn0143354	Dmoj\GI20619	Conspecifc	No-DE	No-DE	No-DE
FBgn0143371	Dmoj\GI20636	No-DE	No-DE	Conspecifc	No-DE
FBgn0143382	Dmoj\GI20647	Conspecifc	Heterospecifc	No-DE	Heterospecifc
FBgn0143428	Dmoj\GI20693	No-DE	No-DE	Consp. and Hetero.	Heterospecifc
FBgn0143460	Dmoj\GI20725	Conspecifc	No-DE	No-DE	No-DE
FBgn0143481	Dmoj\GI20746	No-DE	Heterospecifc	No-DE	Heterospecifc
FBgn0143492	Dmoj\GI20757	Consp. and Hetero.	No-DE	Conspecifc	No-DE
FBgn0143512	Dmoj\GI20777	Conspecifc	No-DE	Conspecifc	No-DE
FBgn0143513	Dmoj\GI20778	Conspecifc	No-DE	Conspecifc	No-DE
FBgn0143558	Dmoj\GI20823	No-DE	No-DE	Conspecifc	No-DE
FBgn0143678	Dmoj\GI20944	No-DE	Heterospecifc	No-DE	Consp. and Hetero.
FBgn0143688	Dmoj\GI20954	No-DE	No-DE	Conspecifc	No-DE
FBgn0143747	NA	No-DE	Heterospecifc	No-DE	No-DE
FBgn0143788	NA	Conspecifc	No-DE	Conspecifc	No-DE
FBgn0143798	Dmoj\GI21066	Conspecifc	No-DE	No-DE	No-DE
FBgn0143822	NA	Consp. and Hetero.	No-DE	No-DE	No-DE
FBgn0143825	NA	No-DE	No-DE	Consp. and Hetero.	No-DE
FBgn0143841	Dmoj\GI21109	Heterospecifc	No-DE	No-DE	No-DE
FBgn0143845	Dmoj\GI21113	Consp. and Hetero. (Different responses)	Consp. and Hetero. (Different responses)	Heterospecifc	Heterospecifc
FBgn0143904	Dmoj\GI21173	No-DE	No-DE	Conspecifc	No-DE
FBgn0144023	Dmoj\GI21293	Conspecifc	No-DE	No-DE	No-DE
FBgn0144163	Dmoj\GI21433	Consp. and Hetero.	No-DE	Consp. and Hetero.	No-DE
FBgn0144203	Dmoj\GI21473	Conspecifc	No-DE	No-DE	No-DE
FBgn0144241	Dmoj\GI21511	Conspecifc	No-DE	No-DE	No-DE
FBgn0144263	NA	Conspecifc	No-DE	No-DE	No-DE
FBgn0144283	NA	Heterospecifc	No-DE	No-DE	No-DE
FBgn0144285	Dmoj\GI21555	Heterospecifc	No-DE	No-DE	No-DE
FBgn0144304	NA	Conspecifc	No-DE	No-DE	No-DE
FBgn0144419	Dmoj\GI21689	No-DE	Heterospecifc	No-DE	No-DE
FBgn0144495	Dmoj\GI21765	Conspecifc	No-DE	No-DE	No-DE
FBgn0144543	Dmoj\GI21813	Conspecifc	No-DE	Conspecifc	No-DE
FBgn0144657	Dmoj\GI21928	Conspecifc	Heterospecifc	Conspecifc	No-DE
FBgn0144771	Dmoj\GI22042	No-DE	No-DE	No-DE	Heterospecifc
FBgn0144805	Dmoj\GI22076	Conspecifc	No-DE	No-DE	No-DE
FBgn0144847	Dmoj\GI22118	Conspecifc	No-DE	No-DE	No-DE
FBgn0144884	Dmoj\GI22155	Conspecifc	No-DE	No-DE	No-DE
FBgn0144942	Dmoj\GI22213	No-DE	No-DE	Consp. and Hetero.	No-DE
FBgn0144950	Dmoj\GI22221	Heterospecifc	No-DE	No-DE	No-DE
FBgn0144963	NA	Heterospecifc	No-DE	No-DE	No-DE
FBgn0145013	NA	Consp. and Hetero.	No-DE	Conspecifc	No-DE
FBgn0145035	NA	Conspecifc	No-DE	No-DE	No-DE
FBgn0145063	NA	No-DE	No-DE	No-DE	Heterospecifc
FBgn0145152	NA	No-DE	No-DE	Conspecifc	No-DE
FBgn0145184	Dmoj\GI22456	No-DE	No-DE	Conspecifc	No-DE
FBgn0145196	NA	No-DE	Conspecifc	No-DE	No-DE
FBgn0145198	NA	Conspecifc	No-DE	Conspecifc	No-DE
FBgn0145262	Dmoj\GI22534	Heterospecifc	No-DE	No-DE	No-DE
FBgn0145302	Dmoj\GI22574	Consp. and Hetero. (Different responses)	Consp. and Hetero. (Different responses)	No-DE	Conspecifc
FBgn0145443	Dmoj\GI22716	Conspecifc	No-DE	No-DE	No-DE
FBgn0145444	Dmoj\GI22717	No-DE	No-DE	Heterospecifc	No-DE
FBgn0145551	Dmoj\GI22824	Heterospecifc	No-DE	No-DE	No-DE
FBgn0145580	Dmoj\GI22853	No-DE	Heterospecifc	No-DE	No-DE
FBgn0145663	Dmoj\GI22936	Conspecifc	No-DE	No-DE	No-DE
FBgn0145801	Dmoj\GI23074	Conspecifc	Heterospecifc	No-DE	Heterospecifc
FBgn0145824	Dmoj\GI23097	Heterospecifc	Consp. and Hetero. (Different responses)	No-DE	Consp. and Hetero.
FBgn0145867	Dmoj\GI23140	No-DE	No-DE	Conspecifc	No-DE
FBgn0145890	Dmoj\GI23163	Heterospecifc	Consp. and Hetero.	Consp. and Hetero.	Consp. and Hetero.
FBgn0145892	Dmoj\GI23165	Conspecifc	No-DE	No-DE	No-DE
FBgn0145896	Dmoj\GI23169	Heterospecifc	No-DE	No-DE	No-DE
FBgn0145907	Dmoj\Obp83ef	Conspecifc	No-DE	No-DE	No-DE
FBgn0145908	NA	Consp. and Hetero.	No-DE	No-DE	No-DE
FBgn0145990	Dmoj\GI23263	Conspecifc	No-DE	No-DE	No-DE
FBgn0146002	Dmoj\GI23275	Conspecifc	No-DE	Conspecifc	No-DE
FBgn0146005	Dmoj\GI23278	Conspecifc	No-DE	Conspecifc	No-DE
FBgn0146016	NA	Heterospecifc	No-DE	No-DE	No-DE
FBgn0146076	Dmoj\GI23349	No-DE	No-DE	Conspecifc	No-DE
FBgn0146077	Dmoj\GI23350	Consp. and Hetero.	Heterospecifc	Consp. and Hetero.	No-DE
FBgn0146078	Dmoj\GI23351	Conspecifc	Heterospecifc	Consp. and Hetero.	Heterospecifc
FBgn0146091	Dmoj\GI23365	Conspecifc	No-DE	No-DE	No-DE
FBgn0146139	Dmoj\GI23413	No-DE	No-DE	Conspecifc	No-DE
FBgn0146157	Dmoj\GI23431	No-DE	No-DE	No-DE	Heterospecifc
FBgn0146169	Dmoj\GI23443	Conspecifc	No-DE	No-DE	No-DE
FBgn0146183	Dmoj\GI23457	Conspecifc	No-DE	No-DE	No-DE
FBgn0146254	NA	Heterospecifc	Consp. and Hetero.	Conspecifc	No-DE
FBgn0146301	Dmoj\GI23575	Conspecifc	No-DE	Conspecifc	No-DE
FBgn0146306	Dmoj\GI23580	No-DE	No-DE	Heterospecifc	No-DE
FBgn0146376	Dmoj\GI23650	No-DE	Consp. and Hetero.	No-DE	No-DE
FBgn0146384	Dmoj\GI23658	Conspecifc	No-DE	No-DE	No-DE
FBgn0146391	Dmoj\GI23665	No-DE	No-DE	Conspecifc	No-DE
FBgn0146392	Dmoj\GI23666	No-DE	No-DE	Heterospecifc	Heterospecifc
FBgn0146411	Dmoj\GI23685	No-DE	Heterospecifc	No-DE	No-DE
FBgn0146438	NA	No-DE	Heterospecifc	No-DE	Consp. and Hetero.
FBgn0146477	NA	No-DE	Heterospecifc	No-DE	No-DE
FBgn0146510	Dmoj\GI23785	Consp. and Hetero.	Heterospecifc	No-DE	Heterospecifc
FBgn0146527	Dmoj\GI23802	Consp. and Hetero. (Different responses)	Consp. and Hetero. (Different responses)	Heterospecifc	Consp. and Hetero. (Different responses)
FBgn0146529	Dmoj\GI23804	Heterospecifc	Consp. and Hetero. (Different responses)	Heterospecifc	Consp. and Hetero. (Different responses)
FBgn0146530	Dmoj\GI23805	Heterospecifc	Consp. and Hetero. (Different responses)	Heterospecifc	No-DE
FBgn0146652	Dmoj\GI23927	Conspecifc	No-DE	Conspecifc	Conspecifc
FBgn0146671	Dmoj\GI23947	No-DE	No-DE	Conspecifc	No-DE
FBgn0146685	NA	Conspecifc	No-DE	Conspecifc	No-DE
FBgn0146697	Dmoj\GI23973	Conspecifc	No-DE	No-DE	No-DE
FBgn0146727	Dmoj\GI24004	Conspecifc	No-DE	No-DE	No-DE
FBgn0146789	Dmoj\GI24066	Heterospecifc	No-DE	No-DE	No-DE
FBgn0146810	Dmoj\GI24087	Conspecifc	No-DE	No-DE	No-DE
FBgn0146848	Dmoj\GI24125	No-DE	No-DE	No-DE	Heterospecifc
FBgn0146951	Dmoj\GI24228	Conspecifc	No-DE	No-DE	No-DE
FBgn0146971	Dmoj\GI24248	Conspecifc	No-DE	Conspecifc	No-DE
FBgn0147010	Dmoj\GI24287	Heterospecifc	No-DE	No-DE	No-DE
FBgn0147013	Dmoj\GI24290	Conspecifc	No-DE	No-DE	No-DE
FBgn0147043	Dmoj\GI24320	No-DE	Conspecifc	No-DE	No-DE
FBgn0147056	Dmoj\GI24333	Conspecifc	No-DE	Conspecifc	No-DE
FBgn0147058	Dmoj\GI24335	Conspecifc	No-DE	No-DE	No-DE
FBgn0147062	Dmoj\GI24339	Heterospecifc	No-DE	No-DE	No-DE
FBgn0147099	Dmoj\GI24376	No-DE	No-DE	Conspecifc	No-DE
FBgn0147135	Dmoj\GI24412	Heterospecifc	No-DE	No-DE	No-DE
FBgn0147151	Dmoj\GI24428	Conspecifc	No-DE	No-DE	No-DE
FBgn0147181	NA	No-DE	Heterospecifc	No-DE	No-DE
FBgn0147195	NA	Consp. and Hetero. (Different responses)	Conspecifc	Heterospecifc	No-DE
FBgn0147354	Dmoj\GI24632	Conspecifc	No-DE	Heterospecifc	No-DE
FBgn0147379	Dmoj\GI24657	Consp. and Hetero.	No-DE	Conspecifc	No-DE
FBgn0147423	Dmoj\GI24701	Heterospecifc	No-DE	No-DE	No-DE
FBgn0147445	Dmoj\GI24723	Conspecifc	No-DE	Conspecifc	No-DE
FBgn0147462	NA	Conspecifc	No-DE	No-DE	No-DE
FBgn0147477	Dmoj\GI24755	Conspecifc	No-DE	No-DE	No-DE
FBgn0147502	Dmoj\GI24780	Heterospecifc	No-DE	No-DE	No-DE
FBgn0147505	Dmoj\GI24783	Heterospecifc	No-DE	Heterospecifc	No-DE
FBgn0147506	NA	Heterospecifc	No-DE	Heterospecifc	No-DE
FBgn0147514	Dmoj\GI24792	No-DE	No-DE	Conspecifc	No-DE
FBgn0147590	Dmoj\GI24870	Heterospecifc	Consp. and Hetero. (Different responses)	Heterospecifc	No-DE
FBgn0253226	NA	Conspecifc	No-DE	No-DE	No-DE
FBgn0253605	NA	No-DE	No-DE	No-DE	Heterospecifc
FBgn0253628	NA	Conspecifc	No-DE	No-DE	No-DE
FBgn0253680	NA	Conspecifc	No-DE	No-DE	No-DE
FBgn0253723	NA	Conspecifc	No-DE	No-DE	No-DE
FBgn0253726	NA	Conspecifc	No-DE	No-DE	No-DE
FBgn0253774	NA	Conspecifc	No-DE	Conspecifc	No-DE
FBgn0280230	NA	No-DE	No-DE	No-DE	Heterospecifc
FBgn0280262	Dmoj\GI25525	Heterospecifc	No-DE	No-DE	No-DE
FBgn0280279	NA	Conspecifc	No-DE	Conspecifc	No-DE
FBgn0280296	NA	Heterospecifc	No-DE	Heterospecifc	No-DE
FBgn0280332	Dmoj\GI25595	No-DE	No-DE	Heterospecifc	Heterospecifc
FBgn0280434	Dmoj\GI25697	No-DE	No-DE	Consp. and Hetero.	No-DE
FBgn0280455	Dmoj\GI25718	No-DE	No-DE	No-DE	Heterospecifc
FBgn0280490	NA	Conspecifc	No-DE	No-DE	Heterospecifc
FBgn0280520	NA	Heterospecifc	Consp. and Hetero. (Different responses)	Heterospecifc	Heterospecifc
FBgn0280590	Dmoj\GI25853	No-DE	No-DE	Heterospecifc	Heterospecifc
FBgn0280649	NA	No-DE	No-DE	Conspecifc	No-DE
FBgn0280655	Dmoj\GI25918	Conspecifc	No-DE	No-DE	No-DE
FBgn0280740	Dmoj\GI26003	Conspecifc	No-DE	No-DE	No-DE
FBgn0280765	Dmoj\GI26028	No-DE	No-DE	Conspecifc	No-DE
FBgn0280812	NA	No-DE	No-DE	Conspecifc	No-DE
FBgn0280879	Dmoj\GI26142	Heterospecifc	No-DE	No-DE	No-DE
FBgn0280884	NA	Conspecifc	No-DE	No-DE	No-DE
FBgn0280886	Dmoj\GI26149	No-DE	No-DE	No-DE	Heterospecifc
FBgn0280899	Dmoj\GI26162	Heterospecifc	Consp. and Hetero. (Different responses)	Heterospecifc	Heterospecifc
FBgn0280906	Dmoj\GI26169	Heterospecifc	Consp. and Hetero. (Different responses)	Heterospecifc	Heterospecifc
FBgn0280907	Dmoj\GI26170	Conspecifc	No-DE	No-DE	No-DE
FBgn0281018	NA	Conspecifc	No-DE	No-DE	No-DE
FBgn0281051	Dmoj\GI26314	Conspecifc	No-DE	Conspecifc	Heterospecifc
FBgn0281090	NA	No-DE	No-DE	Conspecifc	No-DE
FBgn0281175	Dmoj\GI26438	Heterospecifc	Consp. and Hetero. (Different responses)	Heterospecifc	Consp. and Hetero. (Different responses)
FBgn0281236	NA	No-DE	No-DE	Conspecifc	No-DE
FBgn0281279	NA	Conspecifc	No-DE	Consp. and Hetero.	No-DE
FBgn0281395	Dmoj\GI26658	No-DE	No-DE	Conspecifc	No-DE
FBgn0281409	NA	Heterospecifc	No-DE	No-DE	No-DE
FBgn0281472	Dmoj\GI26735	No-DE	No-DE	Consp. and Hetero.	Heterospecifc
FBgn0281499	Dmoj\GI26762	Heterospecifc	Consp. and Hetero. (Different responses)	Heterospecifc	Heterospecifc
FBgn0281528	NA	Conspecifc	No-DE	Conspecifc	No-DE
FBgn0281579	NA	Heterospecifc	Consp. and Hetero. (Different responses)	Heterospecifc	Heterospecifc
FBgn0281604	Dmoj\GI26867	No-DE	No-DE	Conspecifc	No-DE
FBgn0281688	NA	Conspecifc	No-DE	No-DE	No-DE
FBgn0281711	Dmoj\GI26974	No-DE	No-DE	Consp. and Hetero. (Different responses)	No-DE
FBgn0281756	NA	Conspecifc	No-DE	No-DE	No-DE
FBgn0281835	Dmoj\GI27098	No-DE	No-DE	No-DE	Heterospecifc

## Sheet: Table 2S
Table 2S.	Alternatively spliced genes in head transcriptomes (FDR with alpha = 0.01) of females following con- and heterospecific matings between D. mojavensis and D. arizonae. Results are showing significant AS genes for each female species (Dmoj and Dari) and postmating period (45min and 6h). Significant (Con- or Heterospecific) and overlapping genes (Consp. and Hetero.) are indicated. Gene IDs based on …
Gene ID	Gene symbol	Dmoj.fem.45min	Dari.fem.45min	Dmoj.fem.6h	Dari.fem.6h
FBgn0012567	Dmoj\Adh2	No-AS	No-AS	Conspecific	No-AS
FBgn0132887	Dmoj\GI10121	No-AS	Conspecific	No-AS	No-AS
FBgn0132893	NA	No-AS	Conspecific	Conspecific	No-AS
FBgn0132897	NA	Conspecific	Heterospecific	Consp. and Hetero.	No-AS
FBgn0132903	Dmoj\GI10137	Conspecific	No-AS	No-AS	No-AS
FBgn0132908	Dmoj\GI10142	No-AS	Consp. and Hetero.	No-AS	No-AS
FBgn0132977	Dmoj\GI10211	No-AS	No-AS	Heterospecific	No-AS
FBgn0133013	Dmoj\GI10248	Conspecific	No-AS	No-AS	No-AS
FBgn0133093	Dmoj\GI10328	Conspecific	Conspecific	Conspecific	NA
FBgn0133111	Dmoj\GI10347	No-AS	No-AS	Heterospecific	No-AS
FBgn0133190	Dmoj\GI10426	No-AS	No-AS	Conspecific	No-AS
FBgn0133212	Dmoj\GI10448	No-AS	No-AS	Conspecific	No-AS
FBgn0133238	NA	No-AS	Conspecific	No-AS	No-AS
FBgn0133240	Dmoj\GI10476	No-AS	Consp. and Hetero.	No-AS	No-AS
FBgn0133248	Dmoj\Desat2	No-AS	No-AS	Heterospecific	No-AS
FBgn0133249	Dmoj\Desat1	No-AS	Conspecific	Conspecific	No-AS
FBgn0133341	Dmoj\GI10577	Conspecific	No-AS	No-AS	No-AS
FBgn0133384	Dmoj\GI10620	Conspecific	No-AS	Conspecific	No-AS
FBgn0133444	NA	No-AS	No-AS	Conspecific	No-AS
FBgn0133457	Dmoj\GI10693	No-AS	No-AS	Conspecific	No-AS
FBgn0133615	NA	Conspecific	No-AS	No-AS	No-AS
FBgn0133677	NA	Conspecific	No-AS	No-AS	No-AS
FBgn0133841	NA	No-AS	Conspecific	No-AS	No-AS
FBgn0133860	NA	No-AS	Conspecific	Heterospecific	No-AS
FBgn0134065	NA	No-AS	No-AS	Conspecific	No-AS
FBgn0134136	Dmoj\GI11375	No-AS	No-AS	Conspecific	No-AS
FBgn0134276	NA	No-AS	No-AS	Consp. and Hetero.	No-AS
FBgn0134349	Dmoj\GI11589	Conspecific	No-AS	No-AS	No-AS
FBgn0134457	Dmoj\GI11698	No-AS	Heterospecific	No-AS	No-AS
FBgn0134575	Dmoj\GI11816	No-AS	No-AS	Conspecific	No-AS
FBgn0134611	Dmoj\GI11853	No-AS	No-AS	Conspecific	No-AS
FBgn0134637	Dmoj\GI11879	Conspecific	Conspecific	Conspecific	No-AS
FBgn0134734	NA	Conspecific	Heterospecific	No-AS	No-AS
FBgn0134739	Dmoj\GI11982	No-AS	Heterospecific	No-AS	No-AS
FBgn0134771	Dmoj\GI12014	No-AS	No-AS	Conspecific	No-AS
FBgn0134834	Dmoj\GI12077	Conspecific	Heterospecific	Conspecific	No-AS
FBgn0134920	NA	Conspecific	No-AS	Consp. and Hetero.	No-AS
FBgn0134950	Dmoj\GI12193	Consp. and Hetero.	Consp. and Hetero.	Conspecific	No-AS
FBgn0134966	Dmoj\GI12209	Consp. and Hetero.	Conspecific	No-AS	No-AS
FBgn0135021	Dmoj\GI12264	Conspecific	No-AS	Conspecific	No-AS
FBgn0135041	Dmoj\GI12284	No-AS	No-AS	Conspecific	No-AS
FBgn0135126	Dmoj\GI12369	Conspecific	Consp. and Hetero.	Consp. and Hetero.	No-AS
FBgn0135171	Dmoj\GI12414	Conspecific	Consp. and Hetero.	No-AS	No-AS
FBgn0135206	Dmoj\GI12449	No-AS	No-AS	Consp. and Hetero.	No-AS
FBgn0135290	Dmoj\GI12533	No-AS	Heterospecific	No-AS	No-AS
FBgn0135472	Dmoj\GI12715	No-AS	Conspecific	Conspecific	No-AS
FBgn0135483	Dmoj\GI12726	No-AS	No-AS	Conspecific	No-AS
FBgn0135540	NA	Consp. and Hetero.	No-AS	No-AS	No-AS
FBgn0135666	Dmoj\GI12909	No-AS	No-AS	Consp. and Hetero.	No-AS
FBgn0135686	Dmoj\GI12929	No-AS	No-AS	Consp. and Hetero.	No-AS
FBgn0136002	Dmoj\GI13245	No-AS	No-AS	Heterospecific	No-AS
FBgn0136026	Dmoj\GI13269	No-AS	No-AS	Heterospecific	No-AS
FBgn0136036	Dmoj\GI13279	Conspecific	No-AS	No-AS	No-AS
FBgn0136140	Dmoj\GI13383	No-AS	Conspecific	No-AS	No-AS
FBgn0136160	Dmoj\GI13403	Consp. and Hetero.	Conspecific	No-AS	No-AS
FBgn0136403	Dmoj\GI13648	Conspecific	No-AS	No-AS	No-AS
FBgn0136445	NA	No-AS	No-AS	Conspecific	NA
FBgn0136568	Dmoj\GI13814	No-AS	Heterospecific	No-AS	No-AS
FBgn0136659	Dmoj\GI13905	Conspecific	No-AS	Consp. and Hetero.	No-AS
FBgn0136680	Dmoj\GI13926	No-AS	No-AS	Conspecific	No-AS
FBgn0136704	Dmoj\GI13950	No-AS	Conspecific	Conspecific	No-AS
FBgn0136724	Dmoj\GI13970	No-AS	No-AS	Conspecific	No-AS
FBgn0136810	NA	Conspecific	No-AS	No-AS	No-AS
FBgn0136812	Dmoj\GI14058	No-AS	No-AS	Heterospecific	No-AS
FBgn0136836	Dmoj\GI14082	Conspecific	No-AS	Consp. and Hetero.	No-AS
FBgn0136852	Dmoj\GI14098	Conspecific	No-AS	No-AS	No-AS
FBgn0136860	Dmoj\GI14106	Conspecific	Heterospecific	Conspecific	No-AS
FBgn0136934	Dmoj\GI14181	No-AS	Conspecific	No-AS	No-AS
FBgn0137104	Dmoj\GI14351	No-AS	Conspecific	No-AS	No-AS
FBgn0137155	Dmoj\GI14403	No-AS	No-AS	Consp. and Hetero.	No-AS
FBgn0137165	Dmoj\GI14413	No-AS	Consp. and Hetero.	No-AS	No-AS
FBgn0137170	NA	No-AS	No-AS	Conspecific	No-AS
FBgn0137199	Dmoj\GI14447	No-AS	Consp. and Hetero.	No-AS	No-AS
FBgn0137348	Dmoj\GI14597	No-AS	Heterospecific	No-AS	No-AS
FBgn0137381	Dmoj\GI14630	Conspecific	No-AS	No-AS	No-AS
FBgn0137434	Dmoj\GI14683	Conspecific	No-AS	No-AS	No-AS
FBgn0137462	NA	No-AS	No-AS	Conspecific	No-AS
FBgn0137468	Dmoj\GI14717	No-AS	Conspecific	No-AS	No-AS
FBgn0137553	NA	No-AS	NA	Heterospecific	No-AS
FBgn0137579	Dmoj\GI14828	Heterospecific	No-AS	No-AS	No-AS
FBgn0137696	NA	Conspecific	Consp. and Hetero.	Conspecific	No-AS
FBgn0137697	Dmoj\GI14946	No-AS	Conspecific	No-AS	No-AS
FBgn0137786	NA	No-AS	No-AS	Heterospecific	No-AS
FBgn0137788	Dmoj\GI15038	Conspecific	No-AS	Heterospecific	No-AS
FBgn0137789	Dmoj\GI15039	Consp. and Hetero.	Conspecific	No-AS	No-AS
FBgn0137875	NA	No-AS	No-AS	Consp. and Hetero.	No-AS
FBgn0137912	NA	No-AS	No-AS	Conspecific	No-AS
FBgn0137951	NA	Consp. and Hetero.	Heterospecific	Conspecific	No-AS
FBgn0138037	Dmoj\GI15288	Conspecific	No-AS	No-AS	No-AS
FBgn0138061	NA	No-AS	Heterospecific	No-AS	No-AS
FBgn0138086	NA	No-AS	No-AS	Conspecific	No-AS
FBgn0138117	Dmoj\GI15368	No-AS	No-AS	Conspecific	No-AS
FBgn0138183	Dmoj\GI15434	Conspecific	No-AS	No-AS	No-AS
FBgn0138279	Dmoj\GI15530	Consp. and Hetero.	No-AS	Heterospecific	No-AS
FBgn0138316	Dmoj\GI15567	Consp. and Hetero.	Consp. and Hetero.	No-AS	No-AS
FBgn0138347	Dmoj\GI15598	Conspecific	No-AS	No-AS	No-AS
FBgn0138355	Dmoj\GI15606	Conspecific	No-AS	Conspecific	No-AS
FBgn0138465	Dmoj\GI15716	No-AS	Conspecific	No-AS	No-AS
FBgn0138516	NA	No-AS	Conspecific	No-AS	No-AS
FBgn0138529	NA	No-AS	Conspecific	Heterospecific	No-AS
FBgn0138573	NA	Conspecific	No-AS	No-AS	No-AS
FBgn0138631	Dmoj\GI15882	No-AS	No-AS	Conspecific	NA
FBgn0138683	NA	Consp. and Hetero.	No-AS	Consp. and Hetero.	No-AS
FBgn0138722	Dmoj\GI15973	No-AS	No-AS	Conspecific	No-AS
FBgn0138823	Dmoj\GI16074	No-AS	No-AS	Conspecific	No-AS
FBgn0138939	NA	Conspecific	No-AS	Conspecific	No-AS
FBgn0138972	Dmoj\GI16223	No-AS	No-AS	Conspecific	No-AS
FBgn0138981	Dmoj\GI16232	No-AS	No-AS	Conspecific	No-AS
FBgn0139031	NA	No-AS	Conspecific	No-AS	No-AS
FBgn0139053	Dmoj\GI16305	No-AS	Conspecific	No-AS	No-AS
FBgn0139057	Dmoj\Obp19d	No-AS	Heterospecific	Heterospecific	No-AS
FBgn0139173	NA	No-AS	No-AS	Conspecific	No-AS
FBgn0139266	Dmoj\GI16518	Consp. and Hetero.	No-AS	No-AS	No-AS
FBgn0139546	Dmoj\GI16799	Conspecific	No-AS	No-AS	No-AS
FBgn0139547	NA	No-AS	No-AS	Conspecific	No-AS
FBgn0139623	Dmoj\GI16877	No-AS	Conspecific	No-AS	No-AS
FBgn0139800	Dmoj\GI17055	No-AS	Conspecific	Consp. and Hetero.	No-AS
FBgn0139862	Dmoj\GI17118	No-AS	No-AS	Conspecific	No-AS
FBgn0139949	Dmoj\GI17205	No-AS	No-AS	Conspecific	No-AS
FBgn0139950	Dmoj\GI17206	No-AS	No-AS	Consp. and Hetero.	No-AS
FBgn0139964	Dmoj\GI17220	Consp. and Hetero.	No-AS	No-AS	No-AS
FBgn0139965	Dmoj\GI17221	No-AS	Conspecific	Heterospecific	No-AS
FBgn0139967	Dmoj\GI17223	No-AS	No-AS	Consp. and Hetero.	No-AS
FBgn0140034	Dmoj\GI17290	Conspecific	No-AS	Consp. and Hetero.	NA
FBgn0140219	Dmoj\GI17475	Conspecific	No-AS	No-AS	No-AS
FBgn0140276	Dmoj\GI17532	No-AS	No-AS	Conspecific	No-AS
FBgn0140393	NA	No-AS	No-AS	Conspecific	No-AS
FBgn0140395	Dmoj\GI17654	Conspecific	No-AS	Consp. and Hetero.	No-AS
FBgn0140435	Dmoj\GI17694	Consp. and Hetero.	No-AS	Heterospecific	No-AS
FBgn0140627	NA	No-AS	No-AS	Consp. and Hetero.	No-AS
FBgn0140653	Dmoj\GI17912	No-AS	NA	Consp. and Hetero.	No-AS
FBgn0140677	Dmoj\GI17937	Conspecific	No-AS	Conspecific	No-AS
FBgn0140699	NA	Conspecific	Conspecific	Conspecific	No-AS
FBgn0140947	Dmoj\GI18208	No-AS	No-AS	Heterospecific	No-AS
FBgn0141000	NA	No-AS	Conspecific	No-AS	No-AS
FBgn0141085	Dmoj\GI18346	Consp. and Hetero.	NA	Consp. and Hetero.	NA
FBgn0141216	Dmoj\GI18477	Conspecific	Heterospecific	No-AS	No-AS
FBgn0141232	Dmoj\GI18493	Conspecific	No-AS	No-AS	No-AS
FBgn0141311	Dmoj\GI18572	Consp. and Hetero.	No-AS	Consp. and Hetero.	No-AS
FBgn0141359	Dmoj\GI18620	No-AS	No-AS	Consp. and Hetero.	No-AS
FBgn0141537	Dmoj\GI18798	No-AS	Conspecific	No-AS	No-AS
FBgn0141657	Dmoj\GI18918	No-AS	Heterospecific	No-AS	No-AS
FBgn0141688	NA	Conspecific	Conspecific	No-AS	No-AS
FBgn0141743	NA	No-AS	Heterospecific	Conspecific	No-AS
FBgn0141817	Dmoj\GI19078	Conspecific	No-AS	Conspecific	No-AS
FBgn0141825	Dmoj\GI19086	No-AS	No-AS	Conspecific	No-AS
FBgn0141833	Dmoj\GI19094	No-AS	No-AS	Conspecific	No-AS
FBgn0141834	Dmoj\GI19095	No-AS	No-AS	Conspecific	No-AS
FBgn0141843	Dmoj\GI19104	No-AS	No-AS	Conspecific	No-AS
FBgn0141859	Dmoj\GI19120	No-AS	Conspecific	No-AS	No-AS
FBgn0141915	Dmoj\GI19176	Conspecific	No-AS	Conspecific	No-AS
FBgn0141920	NA	No-AS	No-AS	Conspecific	No-AS
FBgn0141945	Dmoj\GI19206	No-AS	Conspecific	No-AS	No-AS
FBgn0141946	Dmoj\GI19207	No-AS	Conspecific	No-AS	No-AS
FBgn0141967	NA	No-AS	Conspecific	No-AS	No-AS
FBgn0142051	Dmoj\GI19313	Consp. and Hetero.	No-AS	Consp. and Hetero.	No-AS
FBgn0142064	Dmoj\GI19326	No-AS	No-AS	Heterospecific	No-AS
FBgn0142083	NA	No-AS	No-AS	Conspecific	No-AS
FBgn0142124	Dmoj\GI19386	No-AS	Heterospecific	No-AS	No-AS
FBgn0142195	Dmoj\GI19457	No-AS	Conspecific	No-AS	No-AS
FBgn0142320	Dmoj\GI19583	Conspecific	No-AS	No-AS	No-AS
FBgn0142366	NA	No-AS	No-AS	Conspecific	No-AS
FBgn0142475	Dmoj\GI19738	No-AS	No-AS	Consp. and Hetero.	No-AS
FBgn0142501	Dmoj\GI19764	No-AS	No-AS	Heterospecific	No-AS
FBgn0142535	Dmoj\GI19798	No-AS	Heterospecific	No-AS	No-AS
FBgn0142638	Dmoj\GI19901	No-AS	No-AS	Heterospecific	No-AS
FBgn0142645	NA	No-AS	Conspecific	No-AS	No-AS
FBgn0142683	Dmoj\GI19946	Heterospecific	NA	Heterospecific	No-AS
FBgn0142778	Dmoj\GI20042	Conspecific	NA	No-AS	No-AS
FBgn0142895	Dmoj\GI20159	No-AS	Heterospecific	No-AS	No-AS
FBgn0142911	Dmoj\GI20175	No-AS	Heterospecific	No-AS	No-AS
FBgn0142998	Dmoj\GI20262	No-AS	No-AS	Heterospecific	No-AS
FBgn0143116	Dmoj\GI20380	Conspecific	Consp. and Hetero.	No-AS	No-AS
FBgn0143153	Dmoj\GI20417	Consp. and Hetero.	No-AS	No-AS	No-AS
FBgn0143203	Dmoj\GI20467	Conspecific	No-AS	Consp. and Hetero.	No-AS
FBgn0143240	Dmoj\GI20504	No-AS	Heterospecific	No-AS	No-AS
FBgn0143273	NA	No-AS	Conspecific	Consp. and Hetero.	Heterospecific
FBgn0143281	NA	No-AS	No-AS	Conspecific	No-AS
FBgn0143304	NA	No-AS	Conspecific	No-AS	No-AS
FBgn0143325	Dmoj\GI20590	No-AS	No-AS	Conspecific	No-AS
FBgn0143329	NA	Conspecific	Consp. and Hetero.	No-AS	No-AS
FBgn0143392	Dmoj\GI20657	No-AS	Heterospecific	No-AS	No-AS
FBgn0143449	Dmoj\GI20714	Consp. and Hetero.	No-AS	Consp. and Hetero.	No-AS
FBgn0143452	Dmoj\GI20717	Conspecific	No-AS	No-AS	No-AS
FBgn0143490	Dmoj\GI20755	No-AS	Heterospecific	No-AS	No-AS
FBgn0143504	Dmoj\GI20769	No-AS	Conspecific	No-AS	No-AS
FBgn0143551	Dmoj\GI20816	No-AS	Conspecific	No-AS	No-AS
FBgn0143626	Dmoj\GI20892	Conspecific	No-AS	No-AS	No-AS
FBgn0143688	Dmoj\GI20954	No-AS	No-AS	Conspecific	No-AS
FBgn0143772	Dmoj\GI21040	No-AS	No-AS	Conspecific	No-AS
FBgn0143893	Dmoj\GI21162	Conspecific	Conspecific	Conspecific	No-AS
FBgn0143924	Dmoj\GI21194	Consp. and Hetero.	No-AS	No-AS	No-AS
FBgn0143955	Dmoj\GI21225	No-AS	No-AS	Conspecific	No-AS
FBgn0144093	NA	No-AS	No-AS	Consp. and Hetero.	No-AS
FBgn0144218	Dmoj\GI21488	No-AS	No-AS	Consp. and Hetero.	No-AS
FBgn0144223	NA	No-AS	Consp. and Hetero.	No-AS	No-AS
FBgn0144250	Dmoj\GI21520	No-AS	No-AS	No-AS	Conspecific
FBgn0144263	NA	Conspecific	Heterospecific	No-AS	No-AS
FBgn0144284	NA	Conspecific	No-AS	No-AS	No-AS
FBgn0144302	Dmoj\GI21572	No-AS	No-AS	Conspecific	No-AS
FBgn0144356	Dmoj\GI21626	Consp. and Hetero.	No-AS	Consp. and Hetero.	No-AS
FBgn0144447	Dmoj\GI21717	No-AS	Consp. and Hetero.	No-AS	No-AS
FBgn0144482	Dmoj\GI21752	Consp. and Hetero.	Conspecific	No-AS	No-AS
FBgn0144544	Dmoj\GI21814	Conspecific	Heterospecific	No-AS	No-AS
FBgn0144725	Dmoj\GI21996	Conspecific	Conspecific	No-AS	No-AS
FBgn0144794	Dmoj\GI22065	No-AS	Conspecific	No-AS	No-AS
FBgn0144805	Dmoj\GI22076	Conspecific	No-AS	No-AS	No-AS
FBgn0144811	NA	No-AS	No-AS	Consp. and Hetero.	Heterospecific
FBgn0145004	Dmoj\GI22276	No-AS	Consp. and Hetero.	No-AS	No-AS
FBgn0145090	Dmoj\GI22362	No-AS	Consp. and Hetero.	Conspecific	No-AS
FBgn0145099	NA	No-AS	No-AS	Heterospecific	No-AS
FBgn0145102	Dmoj\GI22374	No-AS	No-AS	Conspecific	No-AS
FBgn0145203	Dmoj\GI22475	Conspecific	No-AS	No-AS	No-AS
FBgn0145214	NA	No-AS	Conspecific	No-AS	No-AS
FBgn0145248	NA	No-AS	No-AS	Heterospecific	No-AS
FBgn0145369	NA	Consp. and Hetero.	Consp. and Hetero.	Consp. and Hetero.	No-AS
FBgn0145574	NA	No-AS	No-AS	Heterospecific	NA
FBgn0145580	Dmoj\GI22853	No-AS	Conspecific	No-AS	No-AS
FBgn0145601	Dmoj\GI22874	No-AS	Heterospecific	No-AS	No-AS
FBgn0145650	Dmoj\GI22923	No-AS	No-AS	Conspecific	No-AS
FBgn0145654	Dmoj\GI22927	Conspecific	No-AS	No-AS	No-AS
FBgn0145656	Dmoj\GI22929	Conspecific	Heterospecific	No-AS	No-AS
FBgn0145668	NA	Conspecific	No-AS	No-AS	No-AS
FBgn0145680	NA	Conspecific	No-AS	Conspecific	No-AS
FBgn0145848	Dmoj\GI23121	No-AS	No-AS	Conspecific	No-AS
FBgn0145946	Dmoj\GI23219	No-AS	Heterospecific	No-AS	No-AS
FBgn0145975	Dmoj\GI23248	No-AS	Consp. and Hetero.	No-AS	No-AS
FBgn0145993	Dmoj\GI23266	No-AS	No-AS	Conspecific	No-AS
FBgn0146208	Dmoj\GI23482	No-AS	No-AS	Conspecific	No-AS
FBgn0146251	NA	No-AS	Heterospecific	No-AS	No-AS
FBgn0146297	NA	No-AS	No-AS	Conspecific	No-AS
FBgn0146338	NA	Conspecific	No-AS	No-AS	No-AS
FBgn0146389	Dmoj\GI23663	Consp. and Hetero.	Heterospecific	Consp. and Hetero.	No-AS
FBgn0146423	Dmoj\GI23697	No-AS	Consp. and Hetero.	No-AS	No-AS
FBgn0146424	Dmoj\GI23698	No-AS	No-AS	Heterospecific	No-AS
FBgn0146496	Dmoj\GI23771	Consp. and Hetero.	No-AS	No-AS	No-AS
FBgn0146498	Dmoj\GI23773	Conspecific	No-AS	Conspecific	No-AS
FBgn0146515	NA	No-AS	Conspecific	No-AS	NA
FBgn0146557	Dmoj\GI23832	Heterospecific	No-AS	No-AS	No-AS
FBgn0146588	Dmoj\GI23863	No-AS	No-AS	Consp. and Hetero.	No-AS
FBgn0146608	Dmoj\GI23883	No-AS	No-AS	Consp. and Hetero.	No-AS
FBgn0146645	NA	Conspecific	No-AS	Conspecific	No-AS
FBgn0146660	NA	No-AS	Conspecific	No-AS	No-AS
FBgn0146688	Dmoj\GI23964	No-AS	Conspecific	No-AS	No-AS
FBgn0146734	NA	Conspecific	No-AS	No-AS	No-AS
FBgn0146742	Dmoj\slo	No-AS	No-AS	Heterospecific	No-AS
FBgn0146763	Dmoj\GI24040	No-AS	Heterospecific	No-AS	No-AS
FBgn0146790	Dmoj\GI24067	No-AS	Heterospecific	No-AS	Heterospecific
FBgn0146805	Dmoj\GI24082	Conspecific	No-AS	Conspecific	No-AS
FBgn0146829	Dmoj\GI24106	No-AS	No-AS	Conspecific	No-AS
FBgn0146863	NA	No-AS	No-AS	Consp. and Hetero.	No-AS
FBgn0146925	NA	No-AS	No-AS	Conspecific	No-AS
FBgn0147089	Dmoj\GI24366	No-AS	Conspecific	No-AS	NA
FBgn0147301	Dmoj\GI24579	No-AS	No-AS	Heterospecific	No-AS
FBgn0147367	Dmoj\GI24645	No-AS	No-AS	Conspecific	No-AS
FBgn0147378	Dmoj\GI24656	No-AS	No-AS	Conspecific	No-AS
FBgn0147481	Dmoj\GI24759	No-AS	No-AS	Conspecific	No-AS
FBgn0147568	NA	Conspecific	No-AS	No-AS	No-AS
FBgn0147585	Dmoj\GI24865	No-AS	No-AS	Consp. and Hetero.	No-AS
FBgn0280220	NA	Heterospecific	No-AS	No-AS	NA
FBgn0280520	NA	No-AS	NA	NA	Conspecific
FBgn0280726	Dmoj\GI25989	No-AS	No-AS	Heterospecific	No-AS
FBgn0280804	NA	Conspecific	Conspecific	No-AS	No-AS
FBgn0280899	Dmoj\GI26162	NA	NA	NA	Conspecific
FBgn0280911	Dmoj\GI26174	No-AS	Conspecific	No-AS	No-AS
FBgn0280987	NA	Conspecific	Consp. and Hetero.	Consp. and Hetero.	No-AS
FBgn0281090	NA	Consp. and Hetero.	NA	Conspecific	No-AS
FBgn0281156	NA	Consp. and Hetero.	No-AS	No-AS	No-AS
FBgn0281494	Dmoj\GI26757	No-AS	No-AS	No-AS	Heterospecific
FBgn0281499	Dmoj\GI26762	NA	NA	NA	Conspecific
FBgn0281579	NA	No-AS	NA	No-AS	Consp. and Hetero.
FBgn0281601	NA	No-AS	Heterospecific	Heterospecific	No-AS
